# Supplementary material for: Kinetics of the Cell Cycle Arrest Biomarkers (TIMP2 and IGFBP7) for the Diagnosis of Acute Kidney Injury in Critically Ill COVID-19 Patients
Source: MDPI journal article supplement (doi:10.3390/diagnostics13020317), 2023-01-15
Supplement: s1 [file s1]

# Kinetics of the Cell Cycle Arrest Biomarkers (TIMP2 and IGFBP7) for the Diagnosis of Acute Kidney Injury in Critically Ill COVID-19 Patients

Figure S1:Correlation between IL-6 and TIMP2-IGBP7 values at different time points

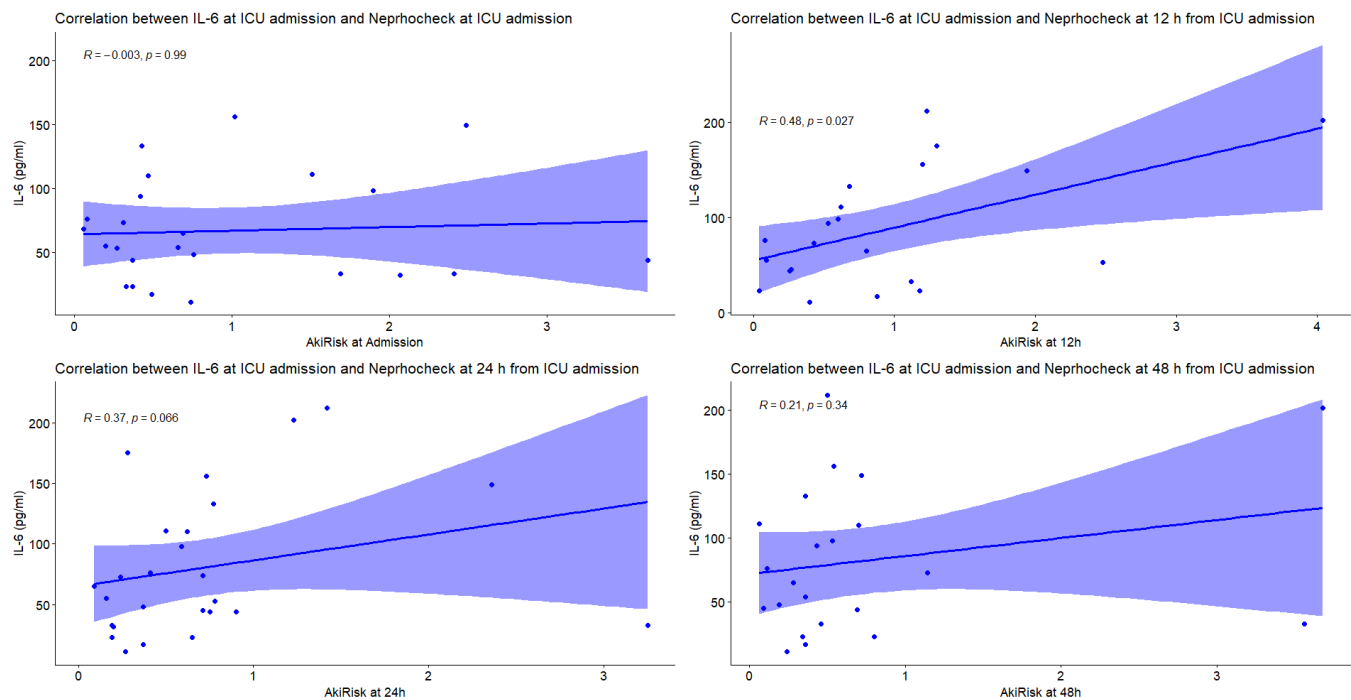

Figure S2:Correlation between highest IL-6 and TIMP2-IGBP7 values at different time points

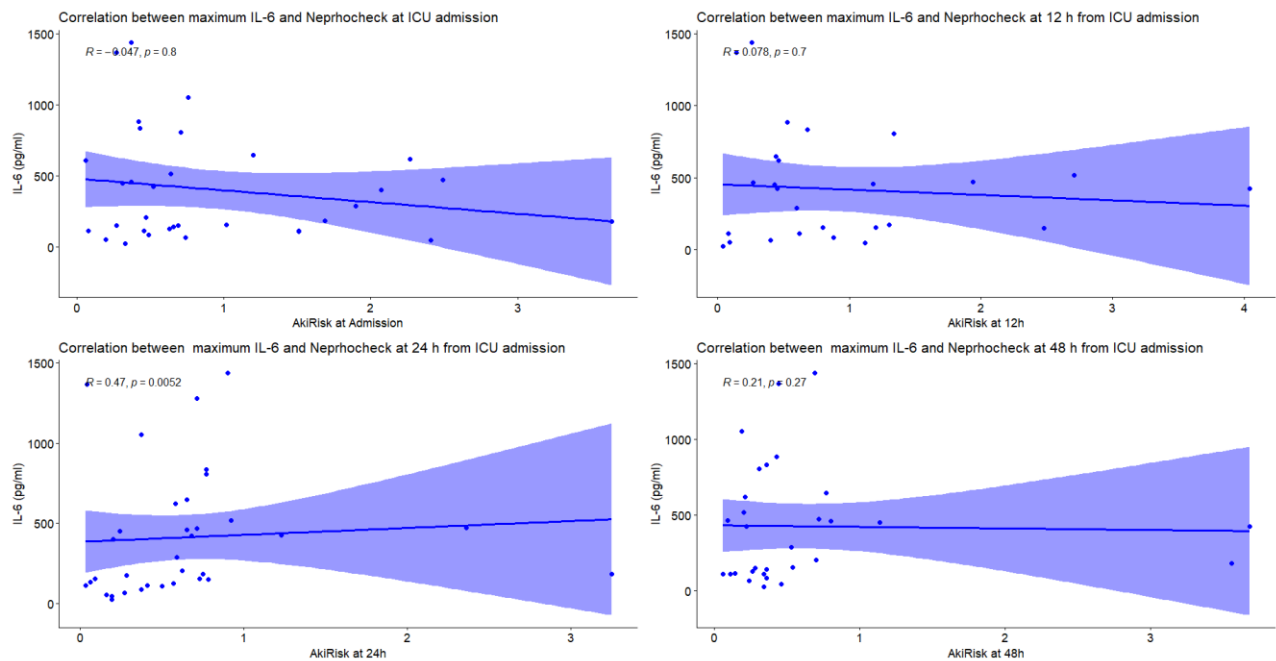

Figure S3: ROC curves of AKIRisk at 12h vs Serum Creatinine (sCr) at ICU admission, vs combination of both markers

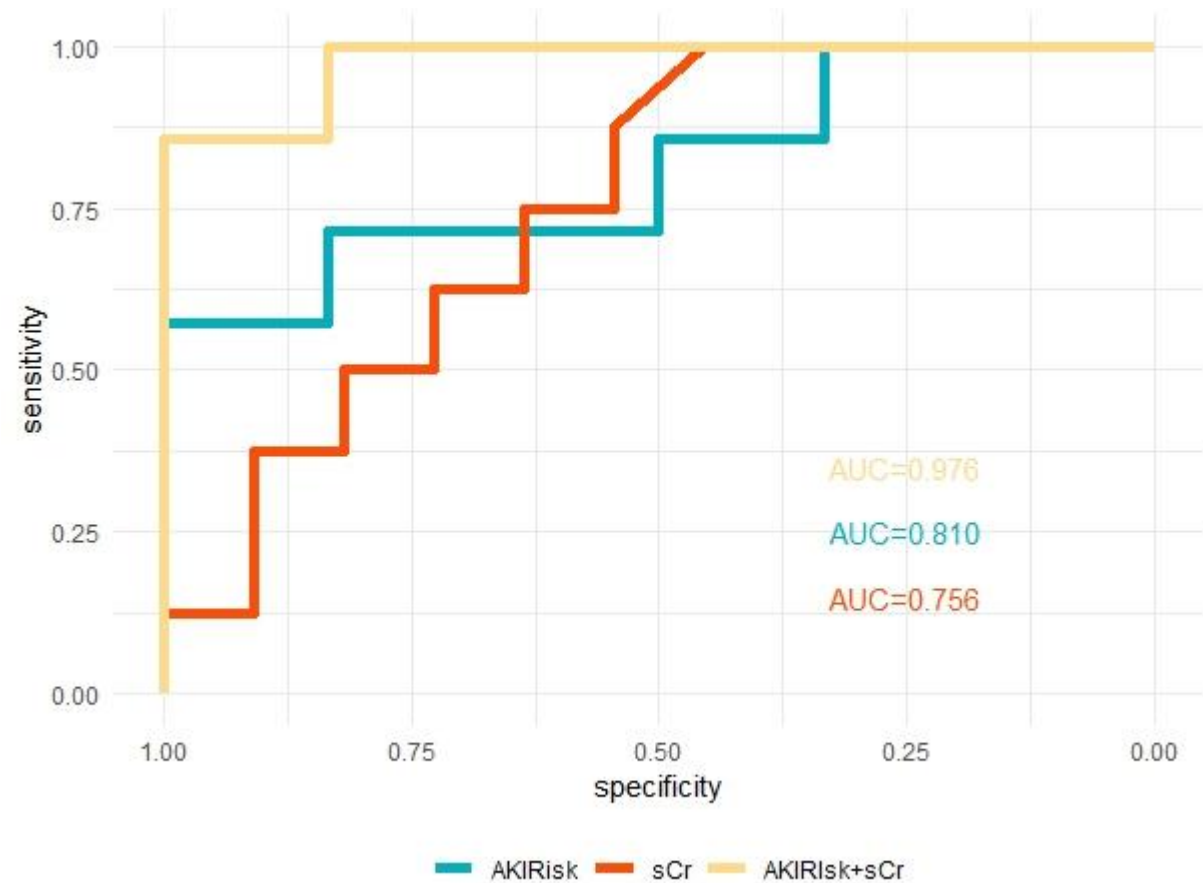

**Table S1: Laboratory data (means, standard errors) in all patients, and divided by severity of AKI**

| Characteristic                             | N  | Overall, N = 411 | No or Mild AKI, N = 131 | Moderate AKI, N = 191 | Severe AKI, N = 91 |
|--------------------------------------------|----|------------------|-------------------------|-----------------------|--------------------|
| sCr at ER admission ( $\mu\text{mol/L}$ )  | 36 | 92 (5)           | 84 (10)                 | 93 (7)                | 101 (10)           |
| sCr at ICU admission ( $\mu\text{mol/L}$ ) | 41 | 77 (4)           | 71 (7)                  | 75 (6)                | 88 (9)             |
| sCr Maximum value ( $\mu\text{mol/L}$ )    | 41 | 130 (16)         | 114 (24))               | 103 (7)               | 212 (54)           |
| IL-6 at ICU admission (pg/ml)              | 29 | 80 (10)          | 80 (21))                | 71 (15)               | 98 (22)            |
| IL-6 at ER admission (pg/ml)               | 30 | 76 (9)           | 44 (6))                 | 78 (15)               | 96 (13)            |
| IL-6 Maximum value (pg/ml)                 | 39 | 408 (61)         | 417 (137)               | 355 (81)              | 503 (114)          |
| AKI risk score at Time 0                   | 34 | 0.94 (0.15)      | 0.96 (0.23)             | 1.00 (0.25)           | 0.79 (0.25)        |
| AKI risk score at 12 hours                 | 29 | 0.92 (0.17)      | 0.47 (0.13)             | 0.81 (0.18)           | 1.65 (0.49)        |
| AKI risk score at 24 hours                 | 36 | 0.65 (0.11)      | 0.81 (0.27)             | 0.47 (0.07)           | 0.80 (0.26)        |
| AKI risk score at 48hours                  | 32 | 0.60 (0.15)      | 0.71 (0.37)             | 0.39 (0.05)           | 0.88 (0.42)        |
